# Supplementary material for: Biaxial Tensile Strain-Induced Enhancement of Thermoelectric Efficiency of α-Phase Se2Te and SeTe2 Monolayers
Source: MDPI journal article supplement (doi:10.3390/nano12010040), 2021-12-23
Supplement: s1 [file s1]

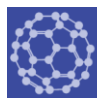

Supporting Information

# Biaxial Tensile Strain-Induced Enhancement of Thermoelectric Efficiency of $\alpha$ -Phase $\text{Se}_2\text{Te}$ and $\text{SeTe}_2$ Monolayers

Shao-Bo Chen <sup>1,2</sup>, Gang Liu <sup>3</sup>, Wan-Jun Yan <sup>2</sup>, Cui-E Hu <sup>4,\*</sup>, Xiang-Rong Chen <sup>1,\*</sup> and Hua-Yun Geng <sup>5</sup>

<sup>11</sup> College of Physics, Institute of Atomic and Molecular Physics, Sichuan University, Chengdu 610064, China; shaobochoen@yeah.net

<sup>2</sup> College of Electronic and Information Engineering, Anshun University, Anshun 561000, China; yanwanjun7817@163.com

<sup>3</sup> School of Physics and Engineering, Henan University of Science and Technology, Luoyang 471023, China; liugang8105@haust.edu.cn

<sup>4</sup> College of Physics and Electronic Engineering, Chongqing Normal University, Chongqing 400047, China

<sup>5</sup> National Key Laboratory for Shock Wave and Detonation Physics Research, Institute of Fluid Physics, CAEP, Mianyang 621900, China; s102genghy@caep.cn

\* Correspondence: cuiehu@cqu.edu.cn (C.-E.H.); xrchen@scu.edu.cn (X.-R.C.)

**Citation:** Chen, S.-B.; Liu, G.; Yan, W.-J.; Hu, C.-E.; Chen, X.-R.; Geng, H.-Y. Biaxial Tensile Strain-Induced Enhancement of Thermoelectric Efficiency of  $\alpha$ -Phase  $\text{Se}_2\text{Te}$  and  $\text{SeTe}_2$  monolayers. *Nanomaterials* **2022**, *12*, 40. <https://doi.org/10.3390/nano12010040>

Academic Editor: Gyaneshwar P. Srivastava

Received: 4 November 2021

Accepted: 17 December 2021

Published: 23 December 2021

**Publisher's Note:** MDPI stays neutral with regard to jurisdictional claims in published maps and institutional affiliations.

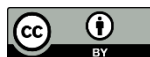

**Copyright:** © 2021 by the authors. Licensee MDPI, Basel, Switzerland. This article is an open access article distributed under the terms and conditions of the Creative Commons Attribution (CC BY) license (<http://creativecommons.org/licenses/by/4.0/>).

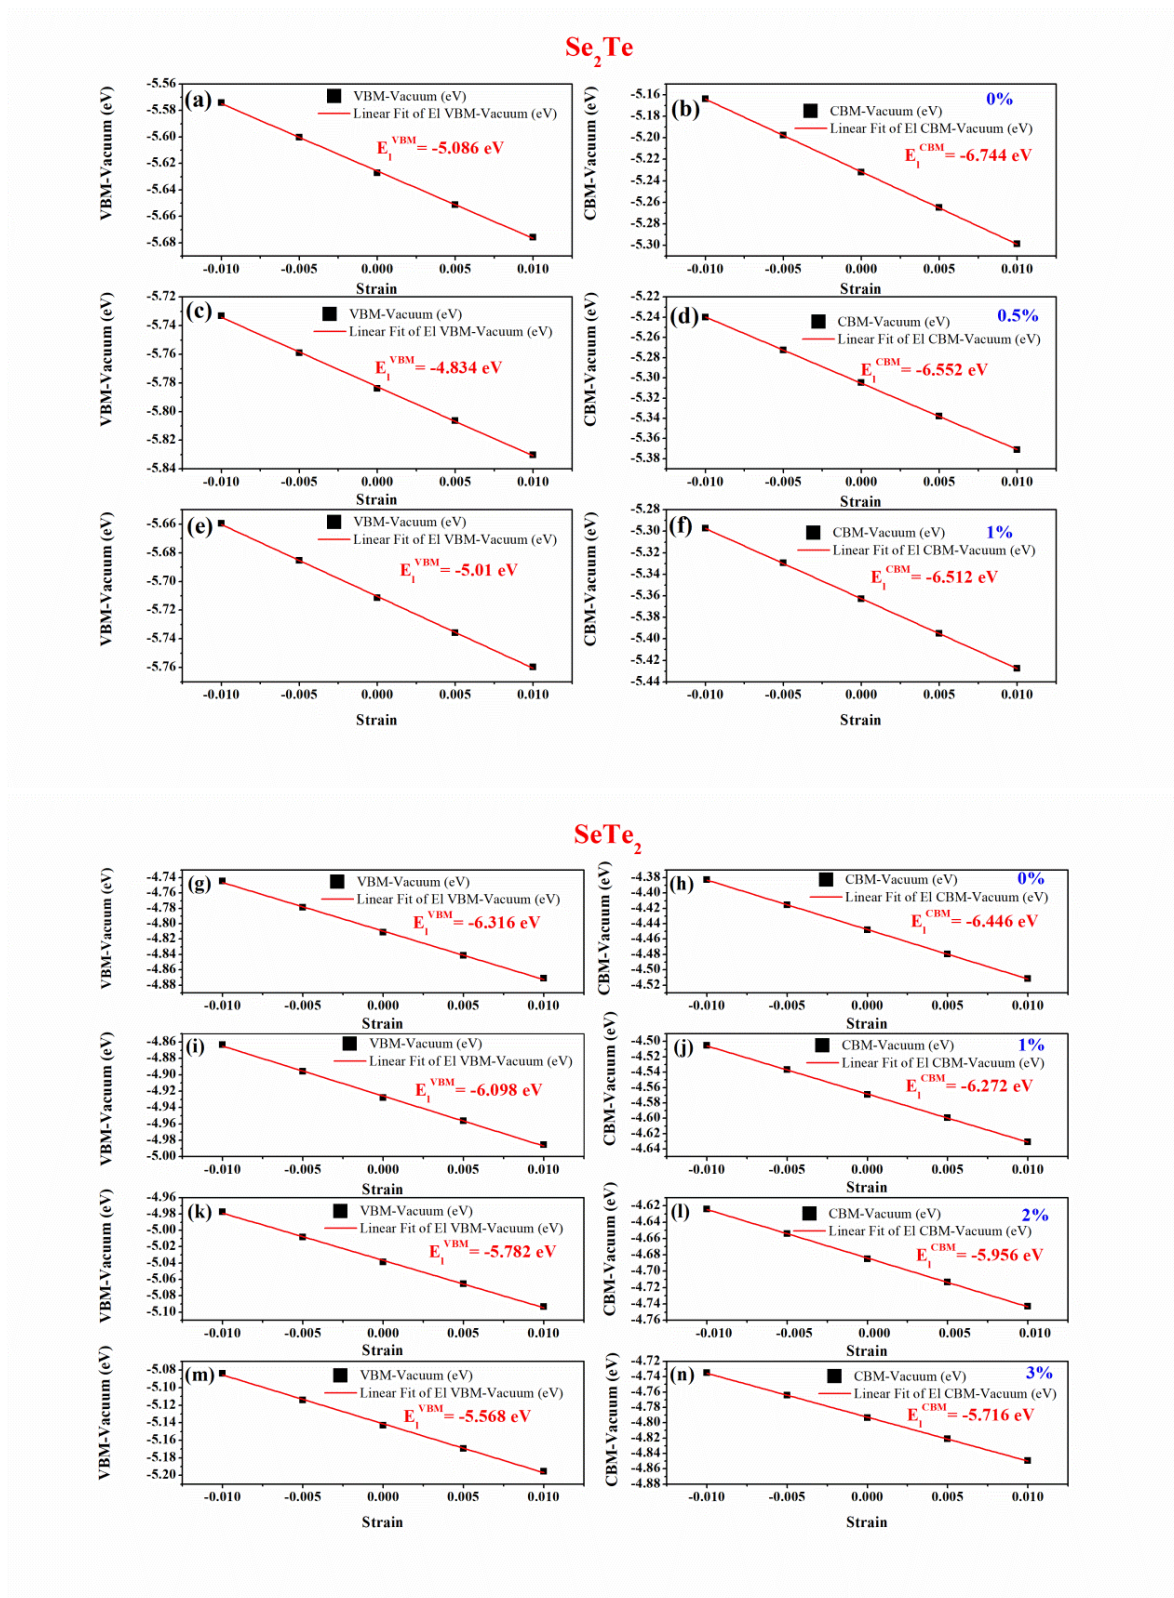

**Figure S1.** (Color online) The strain-dependent of deformation potential constants  $E_1$  of  $\alpha$ -phase (a-f) Se<sub>2</sub>Te and (g-n) SeTe<sub>2</sub> monolayer based on PBE+SOC band structures, respectively. The red straight line is the linear fitting curve.

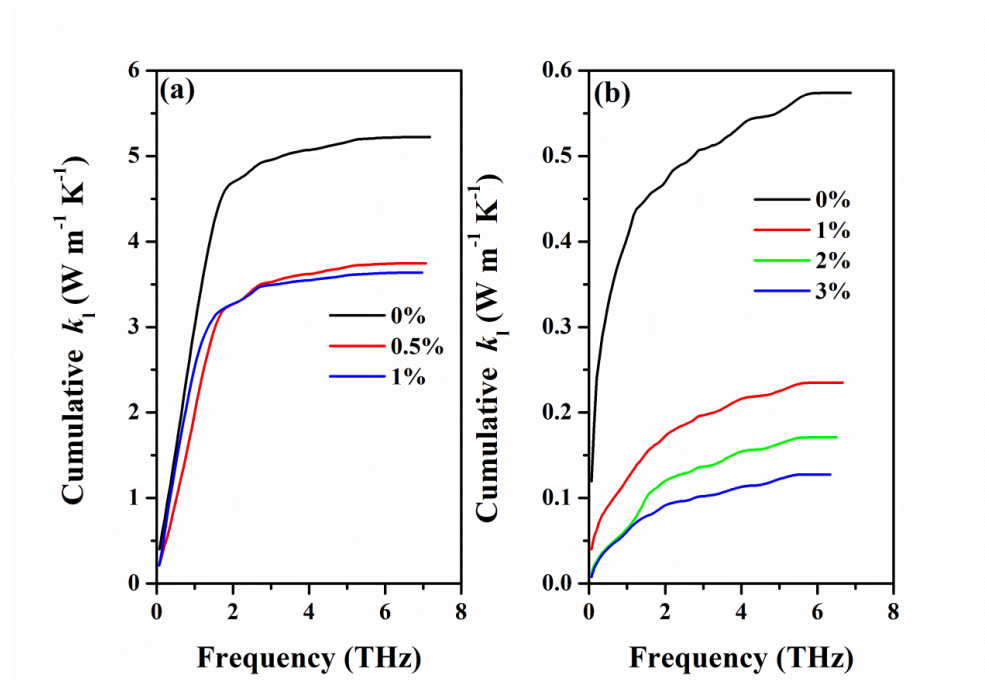

**Figure S2.** (Color online) The strain-dependent of cumulative  $k_l$  of (a)  $\text{Se}_2\text{Te}$  and (b)  $\text{SeTe}_2$  monolayer at 300 K as a function of frequency, respectively.

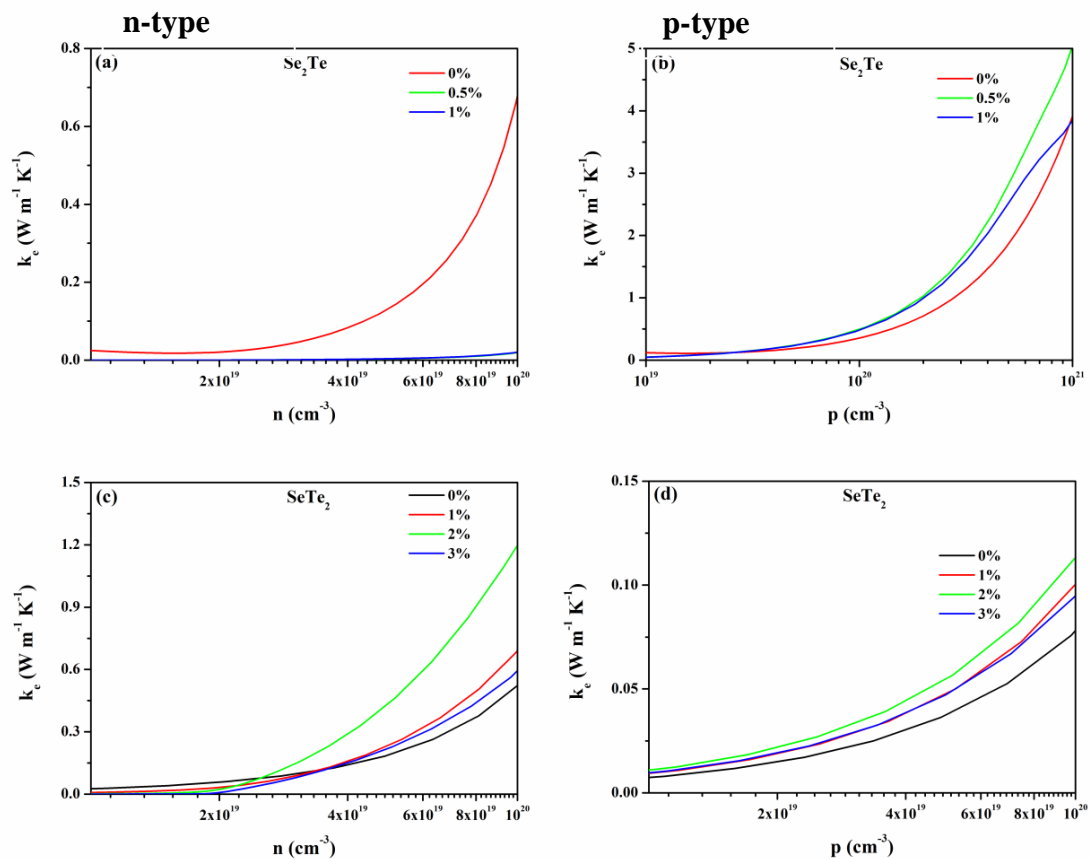

**Figure S3.** (Color online) The strain-dependent of electronic thermal conductivity  $k_e$  of (a, b)  $\text{Se}_2\text{Te}$  and (c, d)  $\text{SeTe}_2$  monolayer at 300 K as a function of concentration for n-type and p-type doping, respectively.
